# Supplementary material
Source: Springer Nature journal article supplement (https://www.springermedizin.de/resource/supplementary/12947_2009_304_MOESM9_ESM.pdf/9556658)

Rest

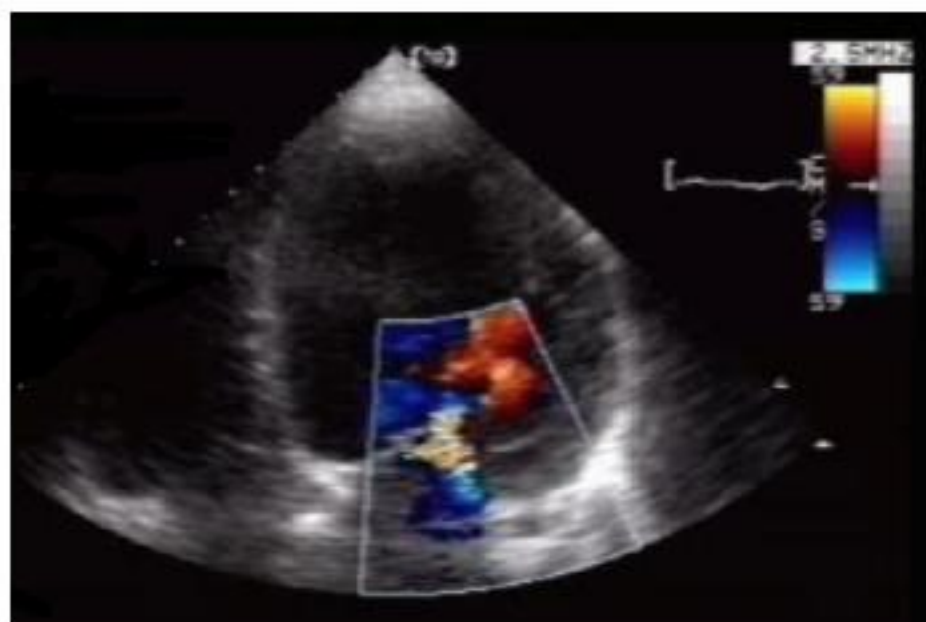

Exercise

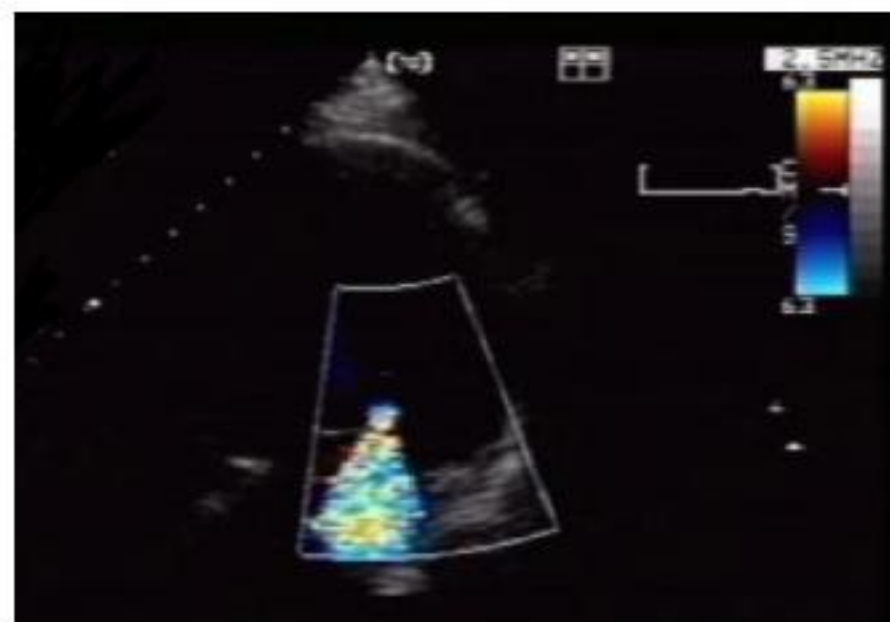

sPAP = 40 mmHg

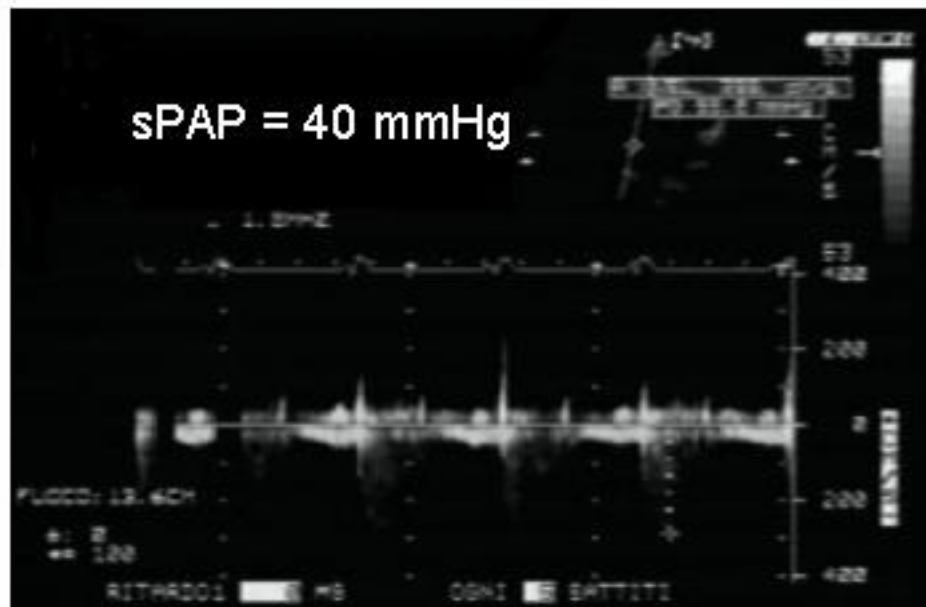

sPAP = 56 mmHg

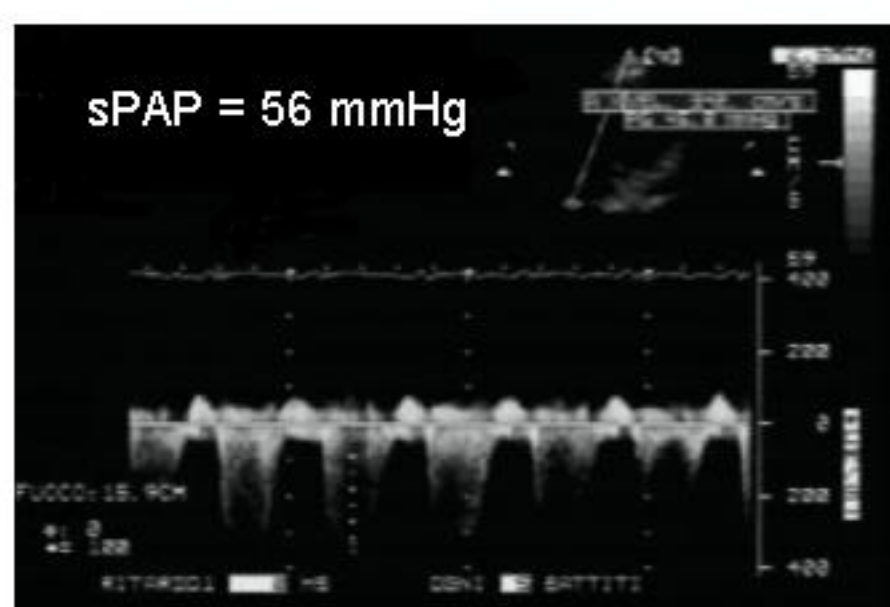

Supplement: MOESM9 [file 9556658]
